# Supplementary material
Source: PubMed Central journal article supplement (PMC2912639)

# SUPPLEMENTARY FIGURE S1

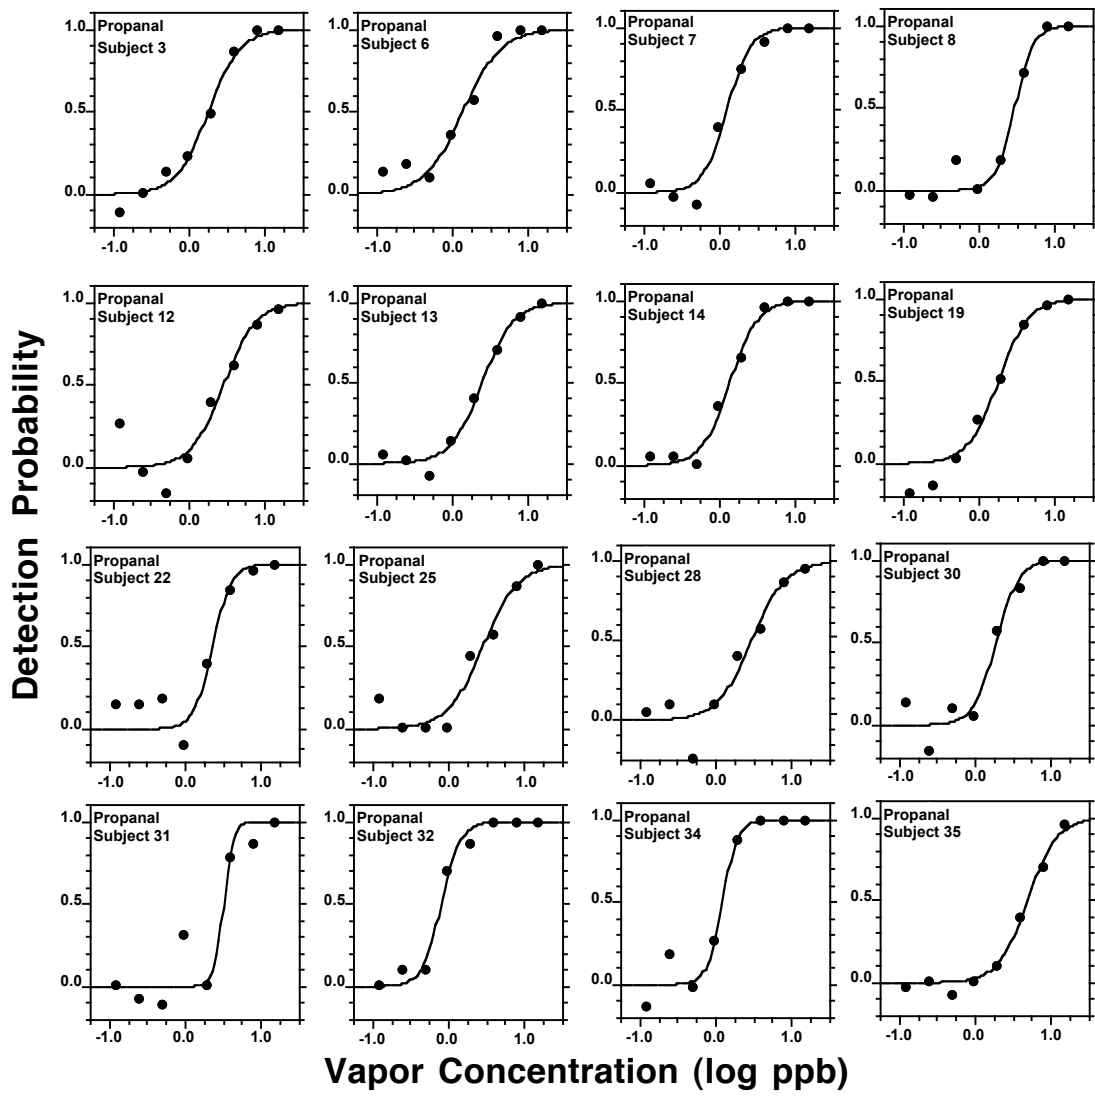

Supplement: bjq018_1.pdf [file bjq018_1.pdf]

# SUPPLEMENTARY FIGURE S2

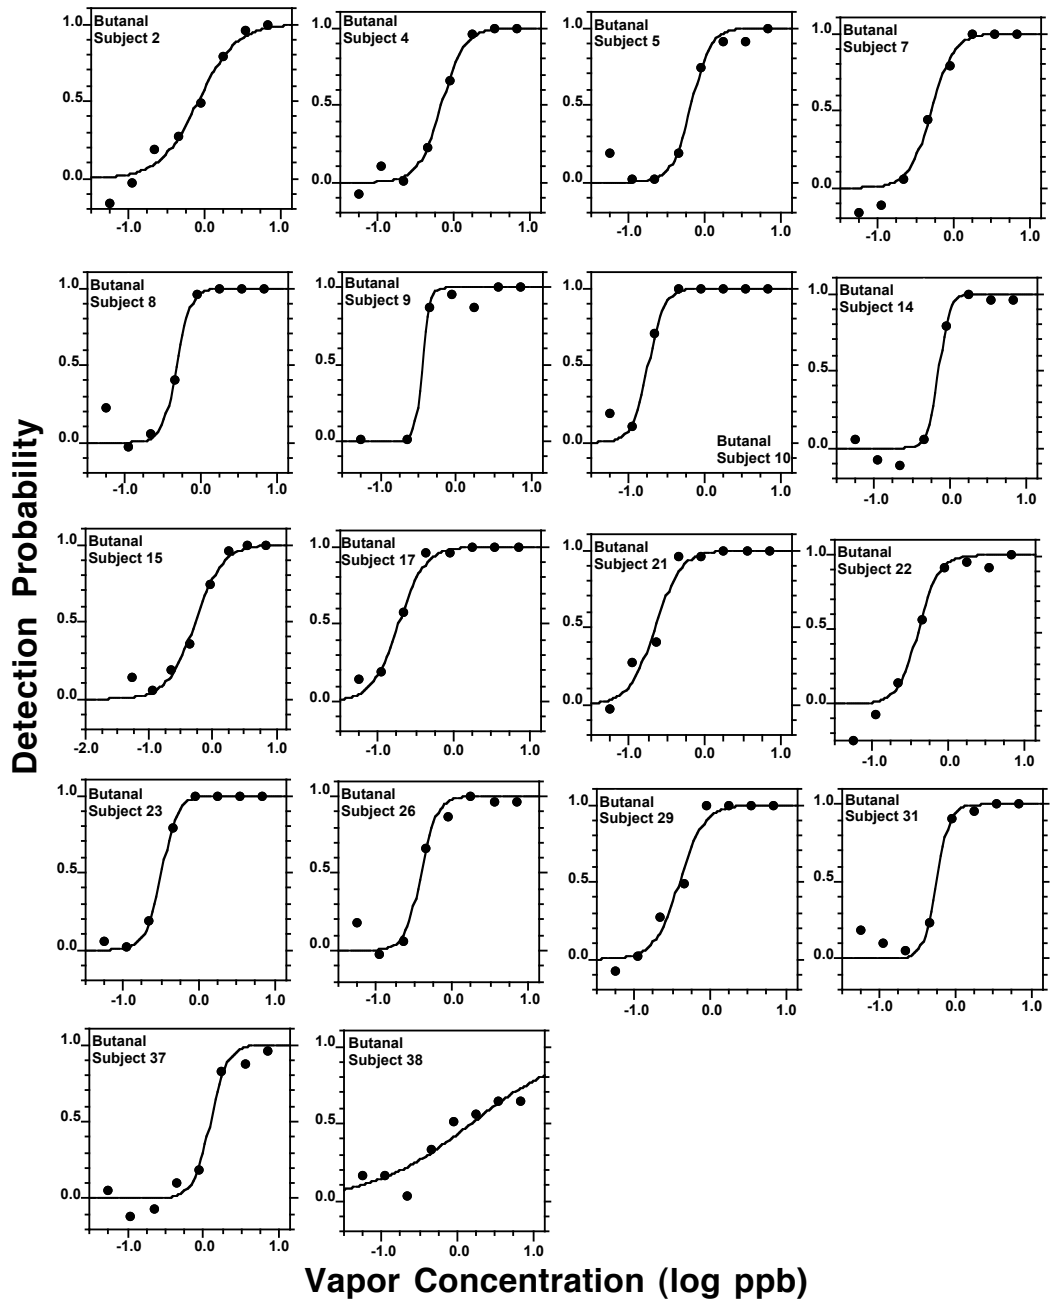

Supplement: bjq018_2.pdf [file bjq018_2.pdf]

SUPPLEMENTARY FIGURE S3

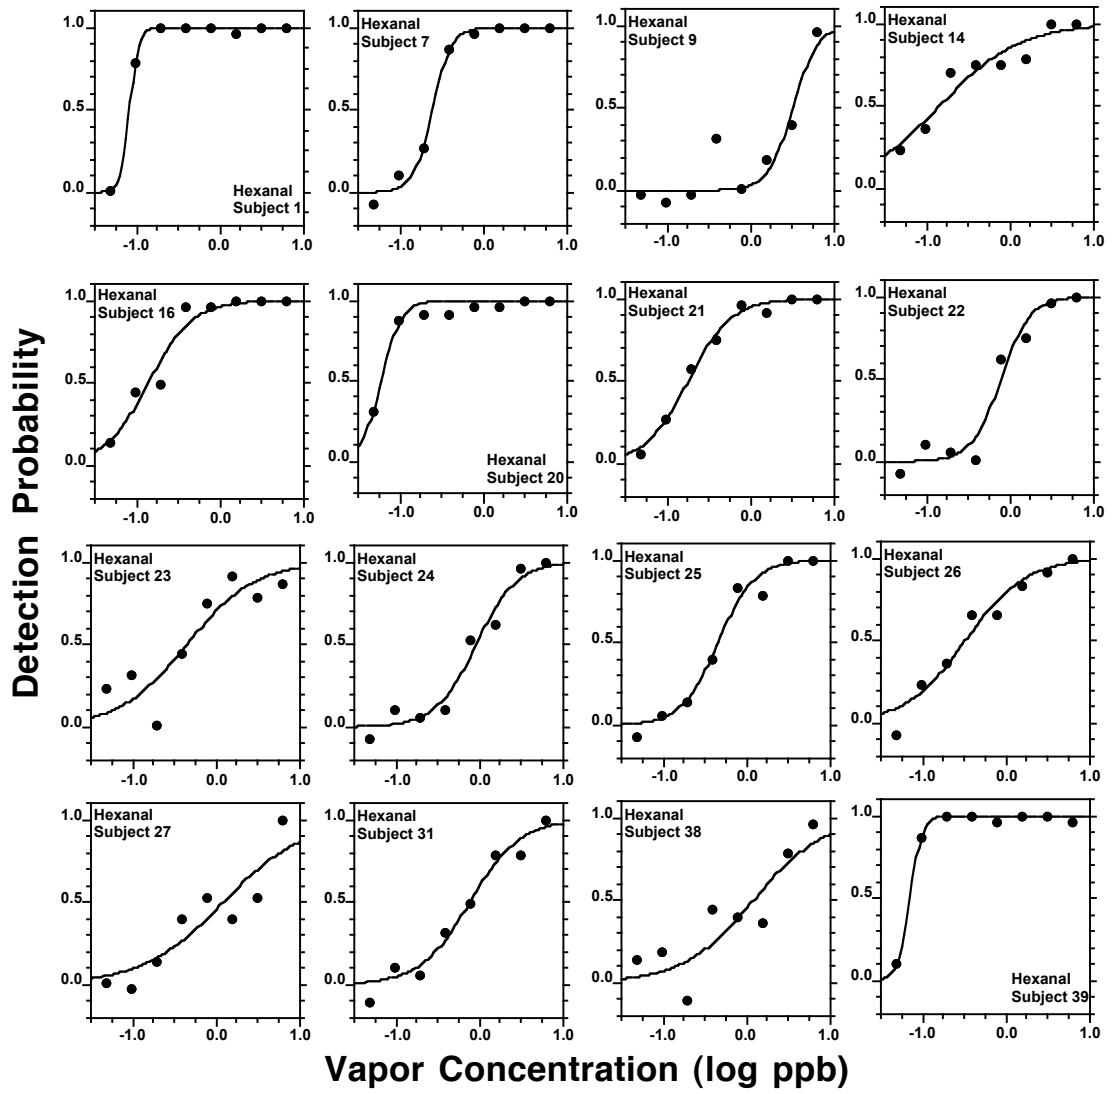

Supplement: bjq018_3.pdf [file bjq018_3.pdf]

SUPPLEMENTARY FIGURE S4

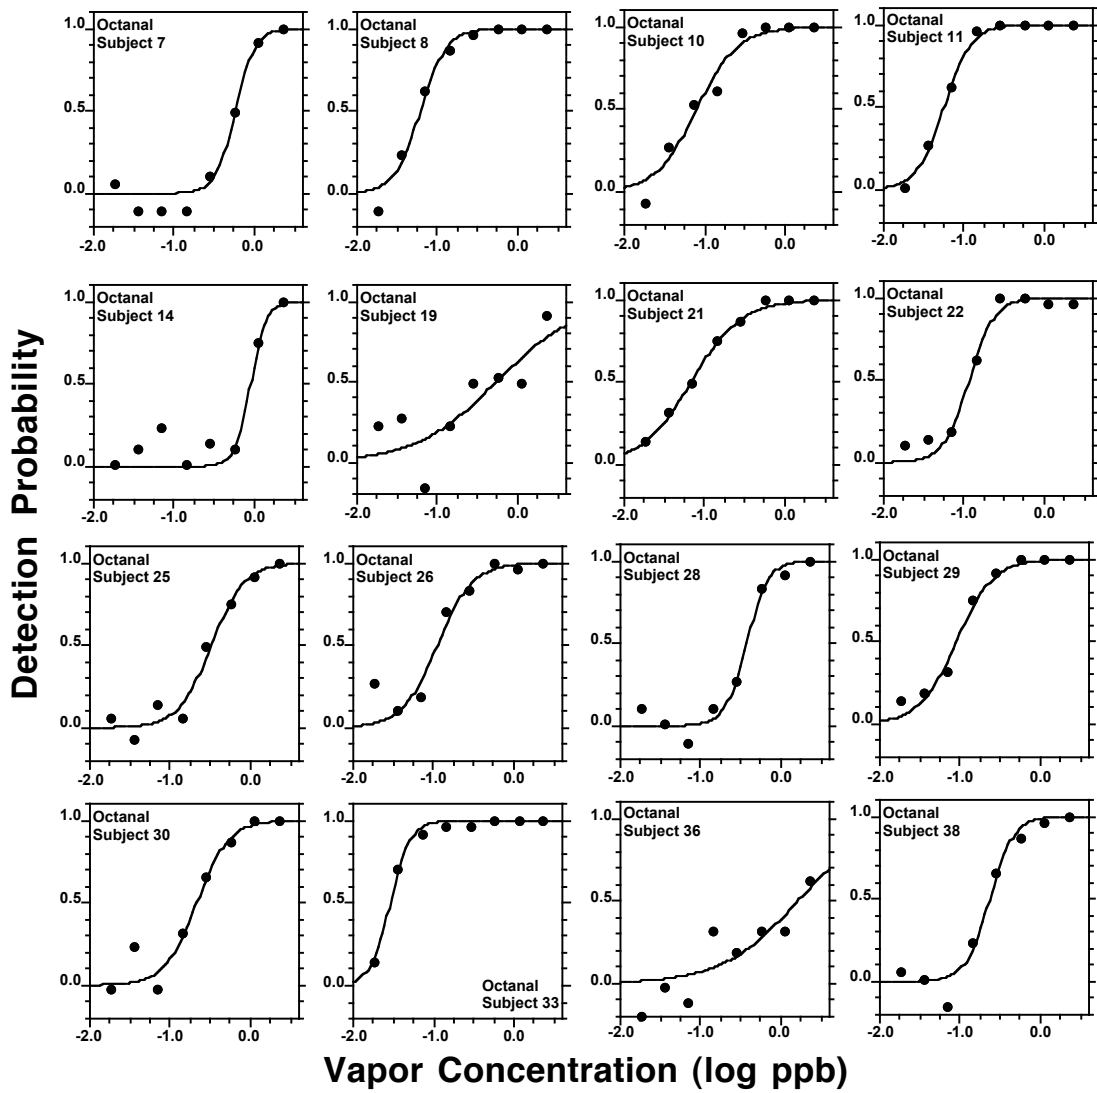

Supplement: bjq018_4.pdf [file bjq018_4.pdf]

SUPPLEMENTARY FIGURE S5

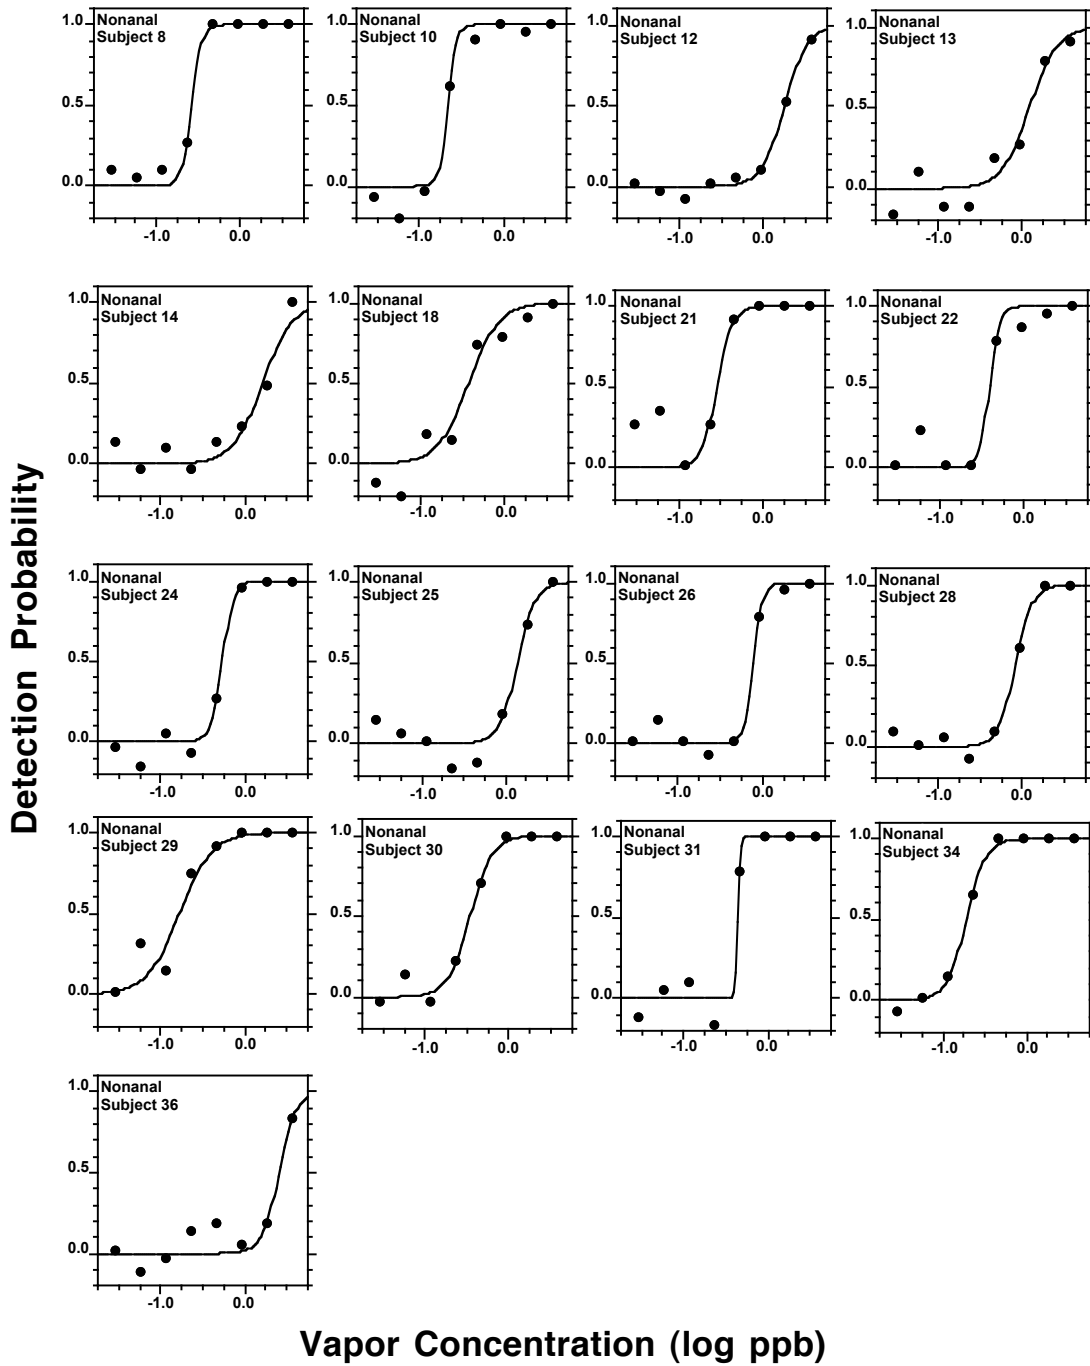

Supplement: bjq018_5.pdf [file bjq018_5.pdf]

SUPPLEMENTARY FIGURE S6

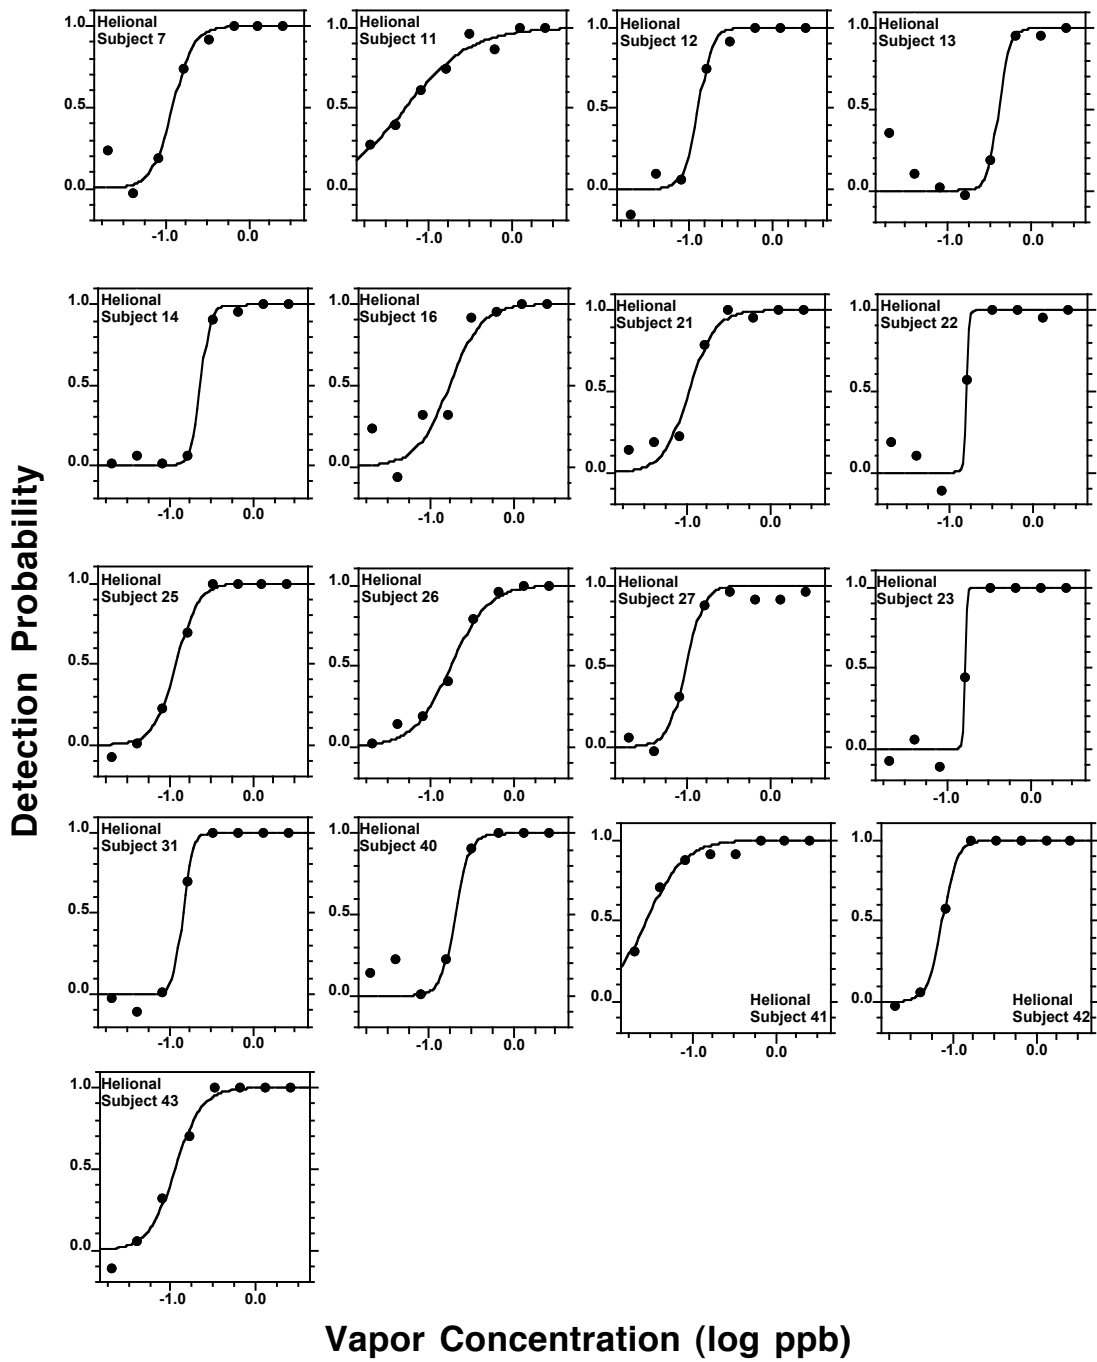

Supplement: bjq018_6.pdf [file bjq018_6.pdf]
